# Supplementary material for: Cultivable, halotolerant ice nucleating bacteria and fungi in coastal precipitation
Source: Copernicus journal article supplement (doi:10.5194/acp-2020-1229), 2021-01-05

## SUPPLEMENTARY FIGURES AND TABLES LEGEND

**Supplementary Table S1.** Identity and characteristics of precipitation and aerosol isolates. Aerosol sampling period labels begin with "A" to distinguish from precipitation sampling periods 1-11 (see Table S3 for precipitation and aerosol sampling times). Taxonomy is denoted by results of BLAST from 16S sequences, percent identity to BLAST assignments, and membership to taxonomic divisions. Isolate identifiers derive from results of multiple sequence alignment analysis (Fig. S2). "IN onset temperature" refers to the first temperature at which isolates exhibited significant IN behavior above the background of the ZoBell media in which they were suspended. Duplicate isolates that were derived from the same sampling period were not featured in Fig. 3a or Fig. 4a and were not counted toward the 14 total identified ice nucleating isolates, but each duplicate was tested for its IN ability and results are shown here.

**Supplementary Table S2.** Cloud characteristics during 11 precipitation events over the sampling site: SIO Pier (32.8662 °N, 117.2544 °W). Cloud base and top altitudes were estimated using the RH product of the High-Resolution Rapid Refresh real-time atmospheric model, and three altitudes within the cloud were used as particle release points for FLEXPART back-trajectories (see Figure 6.1): cloud top, cloud base, and middle (halfway between). Regions where RH (Relative Humidity) > 95 % were considered for all events except Sampling Period 4 and 5, when a criterion of > 90 % was applied. The hourly products closest in time to the precipitation sampling period were used. When cloud depth and altitudes changed over the sampling period, the lowest cloud base and highest cloud altitude were selected as release points for FLEXPART back-trajectories.

**Supplementary Table S3.** Sampling periods for precipitation and aerosol samples collected on SIO Pier (32.8662 °N, 117.2544 °W). Synoptic weather conditions for each precipitation event were determined using National Weather Service Weather Prediction Center Surface Analysis Satellite Composite products.

**Supplementary Table S4.** Summary of ice nucleation behavior of the 9 isolates that were tested for ice nucleation in the absence of media and resuspended in filtered autoclaved seawater (FASW). In comparison with ice nucleation behavior above ZoBell background levels, ice nucleation behavior was generally enhanced in media-free isolates, except in the case of SSA45, *Psychrobacter* sp. The first temperature at which ice nucleation is significant above background was determined by applying the criterion described in Methods. See Methods and Figure S6 for details of media-free freezing experiment.

**Supplementary Figure S1.** Controls of IN measurements. (a) IN activity of 11 ZoBell media blanks. (b) IN activity of selected media-free isolate with a dilution factor of 1 (undiluted). Filtered autoclaved seawater (FASW) was used for resuspension of the isolates for INP measurement. (c) IN activity of selected media-free isolates with a dilution factor of 5. Some isolates were diluted with FASW to decrease opacity such that freezing events could successfully be detected by the camera, and the IN spectra of the

isolates and FASW are scaled by the same dilution factor for analysis of the isolate's ice nucleation ability beyond its media (Methods Sec. 2.4). Only INP concentrations that were significantly enhanced above FASW ( $p < 0.005$ , see Methods Sec. 2.4) are shown in (b) and (c).

**Supplementary Figure S2.** IN spectra of the 14 IN isolates and their respective ZoBell media samples, with IN spectra of both ZoBell and isolates scaled by the isolates' dilution factor. All isolates were diluted with additional ZoBell to decrease opacity such that freezing events could be detected with the camera. Only INP concentrations that were significantly enhanced above ZoBell ( $p < 0.005$ ) are shown. See Methods section for description of the criterion applied to determine significant ice nucleation behavior above the background ZoBell levels.

**Supplementary Figure S3.** INP concentrations per liter air sampled for 7 aerosol samples collected at Ellen Browning Scripps Memorial Pier at Scripps Institution of Oceanography (SIO) (32.8662 °N, 117.2544 °W) between March and May 2016. The blue shaded region represents the composite spectrum of INP concentrations observed in a range of marine and coastal environments including the Caribbean, East Pacific and Bering Sea as well as laboratory-generated nascent sea spray (DeMott et al., 2016)\*. INP spectra of the three samples from which IN isolates were derived (A1, A2, A5, see Table 1 and S1) are outlined in black. While the INPs observed in aerosol samples compare with INP concentrations in marine environments at warmer temperatures (DeMott et al., 2016), concentrations are enhanced at moderate to cold temperatures indicating terrestrial sources may have additionally contributed.

\*DeMott et al., 2016 data has been updated with a completed dataset for the ICE-T study, as shown in (Yang et al., 2020).

**Supplementary Figure S4.** 10-day back-trajectories from the SIO Pier (32.8662 °N, 117.2544 °W, 8m above MLLW) during the 3 aerosol sampling periods from which IN isolates originated, A1, A2, and A5 (see Tables 1, S1). FLEXPART back-trajectories were used to estimate potential aerosol sources. Shown are the particle centroids of back-trajectories. Origins of particles in the 10-day simulation are shown to range from 4000 m over Russia to 3000 m over the Northeast Pacific. FLEXPART results suggest a dominance of marine particle sources to aerosol samples.

**Supplementary Figure S5.** Image of aerosol (red box) and precipitation (yellow box) isolates on agar plates. Isolates derived from cultivation-based isolation.

**Supplementary Figure S6.** INP concentrations at -20 °C in aerosol collected at the Scripps Institution of Oceanography Pier (32°52'01.4"N 117°15'26.5"W) during and between precipitation events. INP concentrations in aerosol are represented by blue circles, and pink circles indicate background INP levels in field blanks. Dark blue bars indicate cumulative precipitation over a 24-hr period. (a) Highlighted in grey are three sampling days during which aerosol samples were available immediately before, during and after precipitation events. (b) Precipitation events over March 6 and 7, 2016 (left grey region in Fig. S5a) are magnified for better visibility. (c) The precipitation event from May

5 to May 6, 2016 (right grey region in Fig. S5a) is magnified for better visibility. For all three periods, INP concentrations in aerosol decrease during precipitation events, indicating sweepout of INPs by hydrometeors.

**Supplementary Figure S7.** Taxonomic distributions of precipitation (a) and aerosol (b) isolates. 83% of the unique families and genera identified in aerosol were common to those found in precipitation.

**Supplementary Figure S8.** Phylogenetic relationships of isolates (in bold) related to Actinobacteria reference sequences. The environmental source of the reference sequences (based on NCBI metadata) is indicated in grey. Isolates with ice nucleating properties are shaded in yellow; bootstrap values (n=500) are indicated at nodes; scale bar represents changes per positions.

**Supplementary Figure S9.** Phylogenetic relationships of isolates (in bold) related to Firmicutes reference sequences. The environmental source of the reference sequences based on NCBI metadata is indicated in grey. Isolates with ice nucleating properties are shaded in yellow; bootstrap values (n=500) are indicated at nodes; scale bar represents changes per positions.

**Supplementary Figure S10.** INP concentrations observed in 14 halotolerant isolates derived from precipitation and aerosol samples, normalized to culture OD (590 nm). Sample numbers in the legend indicate the precipitation or aerosol sample from which the isolate was derived (see Table S3). Datapoints corresponding to isolates from aerosol are outlines in black. Error bars indicate 95% confidence intervals (see Methods Sec. 2.4). Only freezing activity that was significantly enhanced ( $p < 0.005$ ) above ZoBell growth media is shown.

**Supplementary Figure S11.** Relationship of isolates within the same OTUs using multiple sequence alignments of 16S sequences. Multiple sequence alignments were used to generate phylogenetic trees. The resulting branch distances were used to label isolates within the same OTU. Distances  $> 0.1$  were given a new number. This division was further subdivided by distances  $> 0.01$  which were given a unique letter. Distances  $< 0.01$  were considered possible duplicates. Freezing temperatures are shown in yellow boxes to indicate isolates with detected ice nucleation activity.

The data set supporting this manuscript is hosted by the UCSD Library Digital Collections (<https://doi.org/10.6075/J0GQ6W2Z>).

Table S1

| Isolate ID | Isolate                    | Sampling Period | IN Ability | IN Onset Temperature °C | BLAST Identity                                                                                                            | % Identity | Phylum         | Class               | Order             | Family                |
|------------|----------------------------|-----------------|------------|-------------------------|---------------------------------------------------------------------------------------------------------------------------|------------|----------------|---------------------|-------------------|-----------------------|
| Iso1       | Rhodotulula sp.            | 1               | no         | n/a                     | <i>Rhodotulula mucilaginosa</i>                                                                                           | 99%        | Basidiomycota  | Urediniomycetes     | Sporidiales       | Sporidiobolaceae      |
| Iso2       | Cryptococcus sp.           | 1               | yes        | -9.25                   | <i>Cryptococcus aureus</i>                                                                                                | 100%       | Basidiomycota  | Tremellomycetes     | Tremellales       | Tremellaceae          |
| Iso3       | Arthrobracter sp.          | 2               | no         | n/a                     | <i>Arthrobracter</i> sp.( <i>A. luteolus</i> , <i>A. albus</i> )                                                          | 100%       | Actinobacteria | Actinomycetales     | Actinomycetales   | Microbacteriaceae     |
| Iso5       | Brevibacterium sp. 1a      | 2               | no         | n/a                     | <i>Brevibacterium</i> sp. ( <i>B. linens</i> )                                                                            | 100%       | Actinobacteria | Actinomycetales     | Actinomycetales   | Brevibacteriaceae     |
| Iso4       | Curthacterium sp. 1        | 2               | no         | n/a                     | <i>Curthacterium</i> sp. ( <i>C. pusillum</i> , <i>C. flaccumfaciens</i> , <i>C. oceanosedimentum</i> )                   | 100%       | Actinobacteria | Actinomycetales     | Actinomycetales   | Microbacteriaceae     |
| Iso6       | Lysobacter sp.             | 2               | no         | n/a                     | <i>Lysobacter concretions</i>                                                                                             | 99%        | Proteobacteria | Gammaproteobacteria | Xanthomonadales   | Xanthomonadaceae      |
| Iso10A     | Cryptococcus sp. 2         | 3               | no         | n/a                     | <i>Cryptococcus</i> sp. ( <i>C. flevoensis</i> , <i>C. aureus</i> )                                                       | 99%        | Basidiomycota  | Tremellomycetes     | Tremellales       | Tremellaceae          |
| Iso10B     | Paenibacillus sp. 1        | 3               | yes        | -14.75                  | <i>Paenibacillus</i> sp.                                                                                                  | 100%       | Firmicutes     | Bacilli             | Bacillales        | Paenibacillus         |
| Iso9       | Bacillus sp. 2a            | 4               | no         | n/a                     | <i>Bacillus</i> sp. ( <i>B. baekyungensis</i> , <i>B. hwasungensis</i> )                                                  | 100%       | Firmicutes     | Bacilli             | Bacillales        | Bacillaceae           |
| Iso8       | Brevibacterium sp. 1b      | 4               | yes        | -2.25                   | <i>Brevibacterium</i> sp. ( <i>B. luteolum</i> )                                                                          | 97%        | Actinobacteria | Actinomycetales     | Actinomycetales   | Brevibacteriaceae     |
| Iso20      | Bacillus sp. 1b            | 5               | no         | n/a                     | <i>Bacillus</i> sp. ( <i>B. baekyungensis</i> , <i>B. hwasungensis</i> )                                                  | 100%       | Firmicutes     | Bacilli             | Bacillales        | Bacillaceae           |
| Iso12      | Microbacterium sp. 1       | 5               | no         | n/a                     | <i>Microbacterium esteraromaticum</i>                                                                                     | 100%       | Actinobacteria | Actinomycetales     | Actinomycetales   | Microbacteriaceae     |
| Iso19      | Microbacterium sp. 1       | 5               | no         | n/a                     | <i>Microbacterium esteraromaticum</i>                                                                                     | 100%       | Actinobacteria | Actinomycetales     | Actinomycetales   | Microbacteriaceae     |
| Iso7       | Microbacterium sp. 2a1     | 5               | no         | n/a                     | <i>Microbacterium esteraromaticum</i>                                                                                     | 100%       | Actinobacteria | Actinomycetales     | Actinomycetales   | Microbacteriaceae     |
| Iso36A     | Citricoccus sp.            | 6               | no         | n/a                     | <i>Citricoccus</i> sp. ( <i>C. muralis</i> )                                                                              | 97%        | Actinobacteria | Actinomycetales     | Actinomycetales   | Microbacteriaceae     |
| Iso40      | Curthacterium sp. 2        | 6               | no         | n/a                     | <i>Curthacterium</i> sp.                                                                                                  | 100%       | Actinobacteria | Actinomycetales     | Actinomycetales   | Microbacteriaceae     |
| Iso41      | Curthacterium sp. 2        | 6               | no         | n/a                     | <i>Curthacterium flaccumfaciens</i>                                                                                       | 100%       | Actinobacteria | Actinomycetales     | Actinomycetales   | Microbacteriaceae     |
| Iso35A     | Planococcus sp. 2a2        | 6               | no         | n/a                     | <i>Planococcus</i> sp.( <i>P. maritimus</i> , <i>P. planktonis</i> , <i>P. rifeles</i> )                                  | 100%       | Firmicutes     | Bacilli             | Bacillales        | Planococcaceae        |
| Iso36B     | Planococcus sp. 2a2        | 6               | no         | n/a                     | <i>Planococcus</i> sp.                                                                                                    | 100%       | Firmicutes     | Bacilli             | Bacillales        | Planococcaceae        |
| Iso37      | Pseudomonas sp. 1          | 6               | no         | n/a                     | <i>Pseudomonas</i> sp. ( <i>P. synaetha</i> , <i>P. grimontii</i> , <i>P. extremaustralis</i> )                           | 100%       | Proteobacteria | Gammaproteobacteria | Pseudomonadales   | Pseudomonadaceae      |
| Iso35B     | Pseudomonas sp. 2a1        | 6               | no         | n/a                     | <i>Pseudomonas veronii</i>                                                                                                | 100%       | Proteobacteria | Gammaproteobacteria | Pseudomonadales   | Pseudomonadaceae      |
| Iso34      | Pseudomonas sp. 2a2        | 6               | no         | n/a                     | <i>Pseudomonas</i> sp. ( <i>P. synaetha</i> , <i>P. grimontii</i> , <i>P. extremaustralis</i> )                           | 100%       | Proteobacteria | Gammaproteobacteria | Pseudomonadales   | Pseudomonadaceae      |
| Iso39      | Pseudomonas sp. 2a3        | 6               | no         | n/a                     | <i>Pseudomonas</i> sp. ( <i>P. synaetha</i> , <i>P. mucidolens</i> , <i>P. grimontii</i> , )                              | 100%       | Proteobacteria | Gammaproteobacteria | Pseudomonadales   | Pseudomonadaceae      |
| Iso38B     | Psychrobacter sp. 1b1      | 6               | no         | n/a                     | <i>Psychrobacter</i> sp. ( <i>P. maritimus</i> )                                                                          | 100%       | Proteobacteria | Gammaproteobacteria | Pseudomonadales   | Moraxellaceae         |
| Iso38A     | Psychrobacter sp. 1c1      | 6               | no         | n/a                     | <i>Psychrobacter</i> sp.                                                                                                  | 99%        | Proteobacteria | Gammaproteobacteria | Pseudomonadales   | Moraxellaceae         |
| Iso32Ap    | Microbacterium sp. 2a2     | 7               | no         | n/a                     | <i>Microbacterium esteraromaticum</i>                                                                                     | 99%        | Actinobacteria | Actinomycetales     | Actinomycetales   | Microbacteriaceae     |
| Iso33Bp    | Microbacterium sp. 2a4     | 7               | no         | n/a                     | <i>Microbacterium esteraromaticum</i>                                                                                     | 99%        | Actinobacteria | Actinomycetales     | Actinomycetales   | Microbacteriaceae     |
| Iso32B     | Planococcus sp. 1          | 7               | yes        | -12.25                  | <i>Planococcus maritimus</i>                                                                                              | 99%        | Firmicutes     | Bacilli             | Bacillales        | Planococcaceae        |
| Iso33A     | Planococcus sp. 2a1        | 7               | no         | n/a                     | <i>Planococcus</i> sp.                                                                                                    | 99%        | Firmicutes     | Bacilli             | Bacillales        | Planococcaceae        |
| Iso33Bp    | Unknown Microbacterium     | 7               | no         | n/a                     | <i>Unknown Microbacterium</i> sp.                                                                                         | 89%        | Actinobacteria | Actinomycetales     | Actinomycetales   | Microbacteriaceae     |
| Iso31      | Bacillus sp. 1a1           | 8               | yes        | -14.5                   | <i>Bacillus halmapalus</i>                                                                                                | 100%       | Firmicutes     | Bacilli             | Bacillales        | Bacillaceae           |
| Iso29      | Pantoea sp. 1a             | 8               | yes        | -17                     | <i>Pantoea</i> sp. ( <i>P. agglomerans</i> , <i>P. ananatis</i> )                                                         | 100%       | Proteobacteria | Gammaproteobacteria | Enterobacteriales | Enterobacteriaceae    |
| Iso30      | Pantoea sp. 1a             | 8               | yes        | -16.75                  | <i>Pantoea</i> sp. ( <i>P. agglomerans</i> , <i>P. ananatis</i> )                                                         | 100%       | Proteobacteria | Gammaproteobacteria | Enterobacteriales | Enterobacteriaceae    |
| Iso21      | Cellulosimicrobium sp. 1a1 | 9               | yes        | -14                     | <i>Cellulosimicrobium</i> sp. ( <i>C. funkei</i> , <i>C. cellulans</i> , <i>C. maritimum</i> )                            | 100%       | Actinobacteria | Actinomycetales     | Actinomycetales   | Promicromonosporaceae |
| Iso22      | Cellulosimicrobium sp. 1a2 | 9               | yes        | -15                     | <i>Cellulosimicrobium</i> sp. ( <i>C. funkei</i> , <i>C. cellulans</i> , <i>C. maritimum</i> )                            | 99%        | Actinobacteria | Actinomycetales     | Actinomycetales   | Promicromonosporaceae |
| Iso24B     | Cellulosimicrobium sp. 1a3 | 9               | no         | n/a                     | <i>Cellulosimicrobium</i> sp. ( <i>C. funkei</i> , <i>C. cellulans</i> , <i>C. maritimum</i> )                            | 100%       | Actinobacteria | Actinomycetales     | Actinomycetales   | Promicromonosporaceae |
| Iso24A     | Metschnikowia sp.          | 9               | yes        | -16.5                   | <i>Metschnikowia</i> sp. ( <i>M. zobellii</i> , <i>M. krissii</i> , <i>M. reukauffii</i> )                                | 99%        | Ascomycota     | Saccharomycetes     | Saccharomycetales | Metschnikowiaceae     |
| Iso23      | Unknown Arthrobracter      | 9               | yes        | -13.25                  | <i>Unknown Arthrobracter</i> sp.                                                                                          | 86%        | Actinobacteria | Actinomycetales     | Actinomycetales   | Microbacteriaceae     |
| Iso27      | Cellulosimicrobium sp. 1a3 | 10              | yes        | -14.75                  | <i>Cellulosimicrobium</i> sp. ( <i>C. funkei</i> , <i>C. cellulans</i> , <i>C. maritimum</i> )                            | 100%       | Actinobacteria | Actinomycetales     | Actinomycetales   | Promicromonosporaceae |
| Iso28      | Cellulosimicrobium sp. 1a3 | 10              | yes        | -14.5                   | <i>Cellulosimicrobium</i> sp. ( <i>C. funkei</i> , <i>C. cellulans</i> , <i>C. maritimum</i> )                            | 100%       | Actinobacteria | Actinomycetales     | Actinomycetales   | Promicromonosporaceae |
| Iso49      | Psychrobacter sp. 1b2      | 11              | yes        | -13.75                  | <i>Psychrobacter</i> sp. ( <i>P. pulmonis</i> , <i>P. faecalis</i> )                                                      | 99%        | Proteobacteria | Gammaproteobacteria | Pseudomonadales   | Moraxellaceae         |
| SSA42      | Idiomarina sp.             | A1              | yes        | -14.25                  | <i>Idiomarina fortislagdosi</i>                                                                                           | 100%       | Proteobacteria | Gammaproteobacteria | Alteromonadales   | Idiomarinaeae         |
| SSA14      | Bacillus sp. 1a2           | A2              | no         | n/a                     | <i>Bacillus</i> sp. ( <i>B. aquimaris</i> , <i>B. vietnamiensis</i> )                                                     | 100%       | Firmicutes     | Bacilli             | Bacillales        | Bacillaceae           |
| SSA15      | Pantoea sp. 1b             | A2              | no         | n/a                     | <i>Pantoea</i> sp. ( <i>P. aquimaris</i> , <i>B. vietnamiensis</i> )                                                      | 100%       | Proteobacteria | Gammaproteobacteria | Enterobacteriales | Enterobacteriaceae    |
| SSA17      | Pantoea sp. 1b             | A2              | no         | n/a                     | <i>Pantoea</i> sp. ( <i>P. ananatis</i> , <i>P. stewartii</i> , <i>P. agglomerans</i> )                                   | 100%       | Proteobacteria | Gammaproteobacteria | Enterobacteriales | Enterobacteriaceae    |
| SSA18      | Pantoea sp. 1b             | A2              | no         | n/a                     | <i>Pantoea</i> sp. ( <i>P. ananatis</i> , <i>P. stewartii</i> , <i>P. agglomerans</i> )                                   | 100%       | Proteobacteria | Gammaproteobacteria | Enterobacteriales | Enterobacteriaceae    |
| SSA16      | Psychrobacter sp. 2a       | A2              | yes        | -17.5                   | <i>Psychrobacter</i> sp.                                                                                                  | 93%        | Proteobacteria | Gammaproteobacteria | Pseudomonadales   | Moraxellaceae         |
| SSA43      | Bacillus sp. 2b2           | A3              | no         | n/a                     | <i>Bacillus</i> sp. ( <i>B. muralis</i> )                                                                                 | 100%       | Firmicutes     | Bacilli             | Bacillales        | Paenibacillus         |
| SSA44A     | Paenibacillus sp. 1        | A4              | no         | n/a                     | <i>Paenibacillus</i> sp. ( <i>P. tundrai</i> , <i>P. amylolyticus</i> , <i>P. agarivorans</i> , <i>P. laichungensis</i> ) | 100%       | Firmicutes     | Bacilli             | Bacillales        | Bacillaceae           |
| SSA46      | Bacillus sp. 2b1           | A5              | no         | n/a                     | <i>Bacillus halmapalus</i>                                                                                                | 100%       | Firmicutes     | Bacilli             | Bacillales        | Bacillaceae           |
| SSA45      | Psychrobacter sp. 1c2      | A5              | yes        | -14                     | <i>Psychrobacter</i> sp.                                                                                                  | 100%       | Proteobacteria | Gammaproteobacteria | Pseudomonadales   | Moraxellaceae         |
| SSA47      | Bacillus sp. 2b1           | A6              | no         | n/a                     | <i>Bacillus halmapalus</i>                                                                                                | 100%       | Firmicutes     | Bacilli             | Bacillales        | Bacillaceae           |
| SSA48      | Psychrobacter sp. 1a       | A6              | no         | n/a                     | <i>Psychrobacter</i> sp. ( <i>P. pulmonis</i> , <i>P. faecalis</i> )                                                      | 96%        | Proteobacteria | Gammaproteobacteria | Pseudomonadales   | Moraxellaceae         |
| SSA26      | Microbacterium sp. 1       | A7              | no         | n/a                     | <i>Microbacterium esteraromaticum</i>                                                                                     | 99%        | Actinobacteria | Actinomycetales     | Actinomycetales   | Microbacteriaceae     |
| SSA25      | Psychrobacter sp. 2b       | A7              | no         | n/a                     | <i>Psychrobacter</i> sp. ( <i>P. pulmonis</i> , <i>P. faecalis</i> )                                                      | 100%       | Proteobacteria | Gammaproteobacteria | Pseudomonadales   | Moraxellaceae         |

**Table S2**

| Period | Local date | Local time start | Local time stop | UTC date  | UTC time      | RH criteria | Temp (K)  | Pressure (mb)   | Geopotential height (m) |
|--------|------------|------------------|-----------------|-----------|---------------|-------------|-----------|-----------------|-------------------------|
| 1      | 3/6/2016   | 9:07             | 10:07           | 3/6/2016  | 17:07 – 18:07 | >95%        | 283 – 274 | 950 – 750       | 800 – 2000              |
| 2      | 3/7/2016   | 18:30            | 19:30           | 3/8/2016  | 2:30 – 3:30   | >95%        | 275 – 268 | 850 – 750       | 1700 – 3000             |
| 3      | 3/11/2016  | 16:20            | 17:20           | 3/12/2016 | 00:20 – 1:20  | >95%        | 282 – 275 | 950 – 800       | 500 – 2200              |
| 4      | 3/12/2016  | 8:20             | 9:14            | 3/12/2016 | 16:20 – 17:14 | > 90%       | 280 – 278 | 925 – 900       | 1000 – 1100             |
| 5      | 3/29/2016  | 23:35            | 0:35            | 3/30/2016 | 6:35 – 7:35   | > 90%       | 270, 275  | 800, 900        | 2000, 700               |
| 6      | 4/7/2016   | 8:15             | 11:00           | 4/7/2016  | 15:15 – 18:00 | > 95%       | 278 – 270 | 1000, 750 – 650 | 2200 – 4000             |
| 7      | 4/7/2016   | 12:07            | 13:07           | 4/7/2016  | 19:07 – 20:07 | > 95%       | 275 – 265 | 750 – 600       | 2000 – 4000             |
| 8      | 5/5/2016   | 22:59            | 23:59           | 5/6/2016  | 6:00 – 7:00   | > 95%       | 275 – 273 | 825 – 750       | 1100 – 2100             |
| 9      | 5/6/2016   | 2:59             | 3:59            | 5/6/2016  | 10:00 – 11:00 | >95%        | 282 – 270 | 875 – 700       | 1000 – 3000             |
| 10     | 5/6/2016   | 4:59             | 5:59            | 5/6/2016  | 13:00 – 14:00 | > 95%       | 275 – 273 | 825 – 675       | 2000 – 3000             |
| 11     | 5/6/2016   | 8:59             | 9:59            | 5/6/2016  | 17:00 – 18:00 | > 95%       | 275 – 270 | 825 – 750       | 1800 – 2800             |

**Table S3****Precipitation**

| Sampling Period | Local Date | Local Time    | UTC Date  | UTC time      | Number of Isolates | General characteristics                                 |
|-----------------|------------|---------------|-----------|---------------|--------------------|---------------------------------------------------------|
| 1               | 3/6/2016   | 9:07 – 10:07  | 3/6/2016  | 17:07 – 18:07 | 2                  | frontal rain                                            |
| 2               | 3/7/2016   | 18:30 – 19:30 | 3/8/2016  | 2:30 – 3:30   | 4                  | convective, local updraft rain                          |
| 3               | 3/11/2016  | 16:20 – 17:20 | 3/12/2016 | 00:20 – 1:20  | 2                  | frontal rain from decaying atmospheric river            |
| 4               | 3/12/2016  | 8:20 – 9:14   | 3/12/2016 | 16:20 – 17:14 | 2                  | warm, low cloud rain                                    |
| 5               | 3/29/2016  | 23:35 – 0:35  | 3/30/2016 | 6:35 – 7:35   | 4                  | scattered, low coastal clouds, lack of dynamical system |
| 6               | 4/7/2016   | 8:15 – 11:00  | 4/7/2016  | 15:15 – 18:00 | 7                  | frontal rain from tropical moisture source              |
| 7               | 4/7/2016   | 12:07 – 13:07 | 4/7/2016  | 19:07 – 20:07 | 4                  | frontal rain from tropical moisture source              |
| 8               | 5/5/2016   | 22:59 – 23:59 | 5/6/2016  | 6:00 – 7:00   | 2                  | pre-frontal rain, meso-scale system                     |
| 9               | 5/6/2016   | 2:59 – 3:59   | 5/6/2016  | 10:00 – 11:00 | 3                  | post-frontal rain, meso-scale system                    |
| 10              | 5/6/2016   | 4:59 – 5:59   | 5/6/2016  | 13:00 – 14:00 | 1                  | post-frontal rain, meso-scale system                    |
| 11              | 5/6/2016   | 8:59 – 9:59   | 5/6/2016  | 17:00 – 18:00 | 1                  | post-frontal rain, meso-scale system                    |

**Aerosol**

| Sampling Period | Local Date | Local Time    | UTC Date  | UTC time      | Number of Isolates |
|-----------------|------------|---------------|-----------|---------------|--------------------|
| A1              | 3/5/2016   | 10:40 – 12:15 | 3/5/2016  | 18:40 – 20:15 | 1                  |
| A2              | 3/7/2016   | 14:58 – 16:52 | 3/7/2016  | 22:58 – 23:52 | 5                  |
| A3              | 3/8/2016   | 11:34 – 14:42 | 3/8/2016  | 19:34 – 22:42 | 1                  |
| A4              | 3/28/2016  | 09:09 – 12:22 | 3/28/2016 | 16:09 – 19:22 | 1                  |
| A5              | 4/28/2016  | 11:45 – 13:22 | 4/28/2016 | 18:45 – 20:22 | 2                  |
| A6              | 5/5/2016   | 12:00 – 14:23 | 5/5/2016  | 19:00 – 21:23 | 2                  |
| A7              | 5/6/2016   | 14:15 – 16:37 | 5/6/2016  | 21:15 – 23:37 | 2                  |

**Table S4**

| Isolate | Species                                                                  | ZoBell                           |                                             | FASW                             |                                             |
|---------|--------------------------------------------------------------------------|----------------------------------|---------------------------------------------|----------------------------------|---------------------------------------------|
|         |                                                                          | Ice nucleation above background? | First Significant Freezing Temperature (°C) | Ice nucleation above background? | First Significant Freezing Temperature (°C) |
| Iso3    | Arthrobacter sp. (A. luteolus, A.citreus)                                | no                               | n/a                                         | yes                              | -15.25                                      |
| Iso4    | Curtobacterium sp. (C. pusillum, C. flaccumfaciens, C. oceanosedimentum) | no                               | n/a                                         | yes                              | -13                                         |
| Iso5    | Brevibacterium sp. (B.linens)                                            | no                               | n/a                                         | yes                              | -11.75                                      |
| Iso30   | Pantoea sp. (P. agglomerans, P. ananatis)                                | yes                              | -16.75                                      | yes                              | -15.5                                       |
| SSA42   | Idiomarina fontislapidosi                                                | yes                              | -14.25                                      | yes                              | -9.75                                       |
| SSA16   | Psychrobacter sp.                                                        | yes                              | -17.5                                       | yes                              | -15.5                                       |
| SSA18   | Pantoea sp. (P. ananatis, P. 7tewartia, P. agglomerans)                  | no                               | n/a                                         | yes                              | -11.5                                       |
| SSA45   | Psychrobacter sp.                                                        | yes                              | -14                                         | no                               | n/a                                         |
| SSA26   | Microbacterium esteraromaticum                                           | no                               | n/a                                         | no                               | n/a                                         |

Figure S1

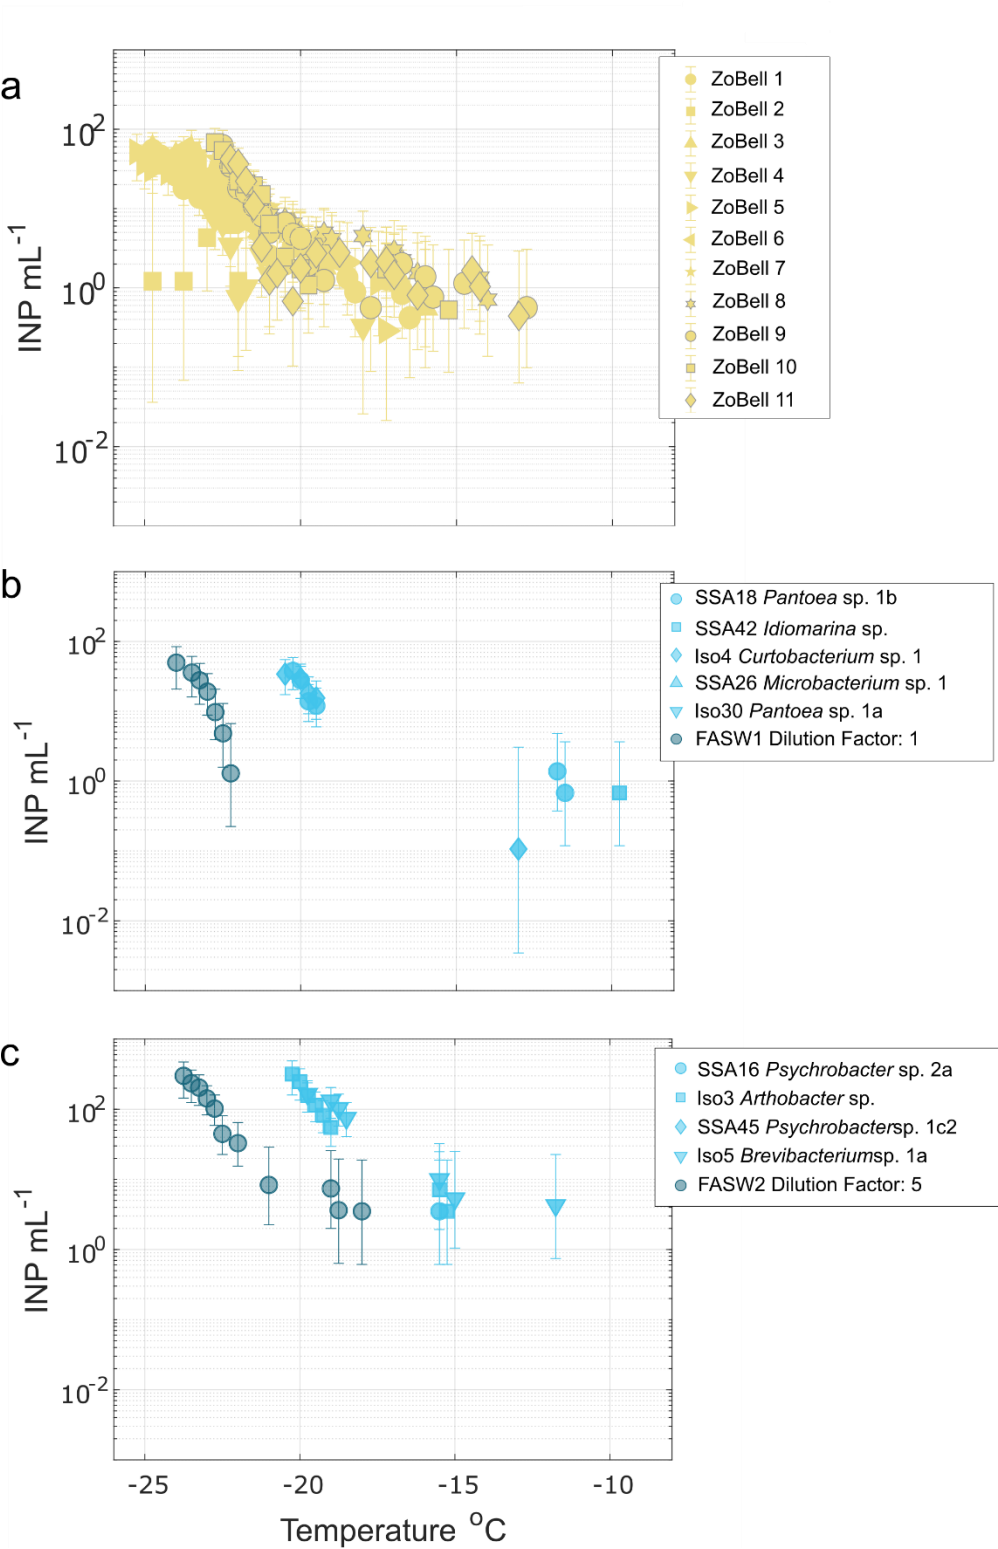



Figure S2

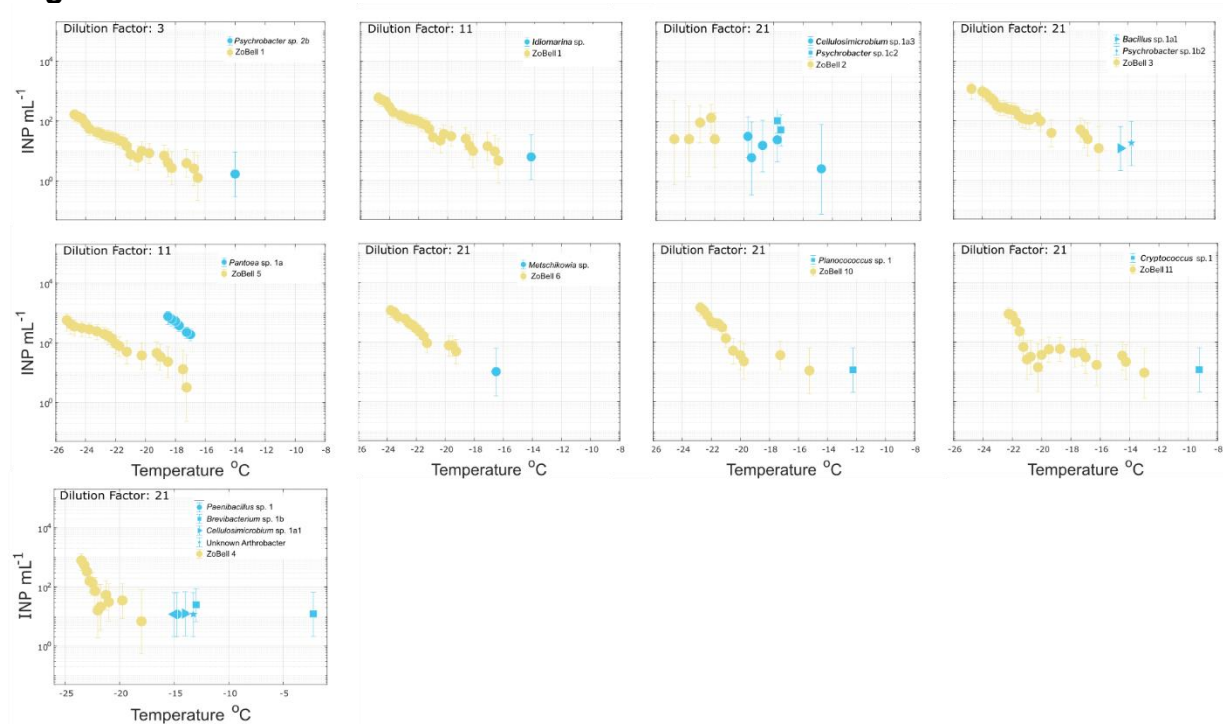

Figure S3

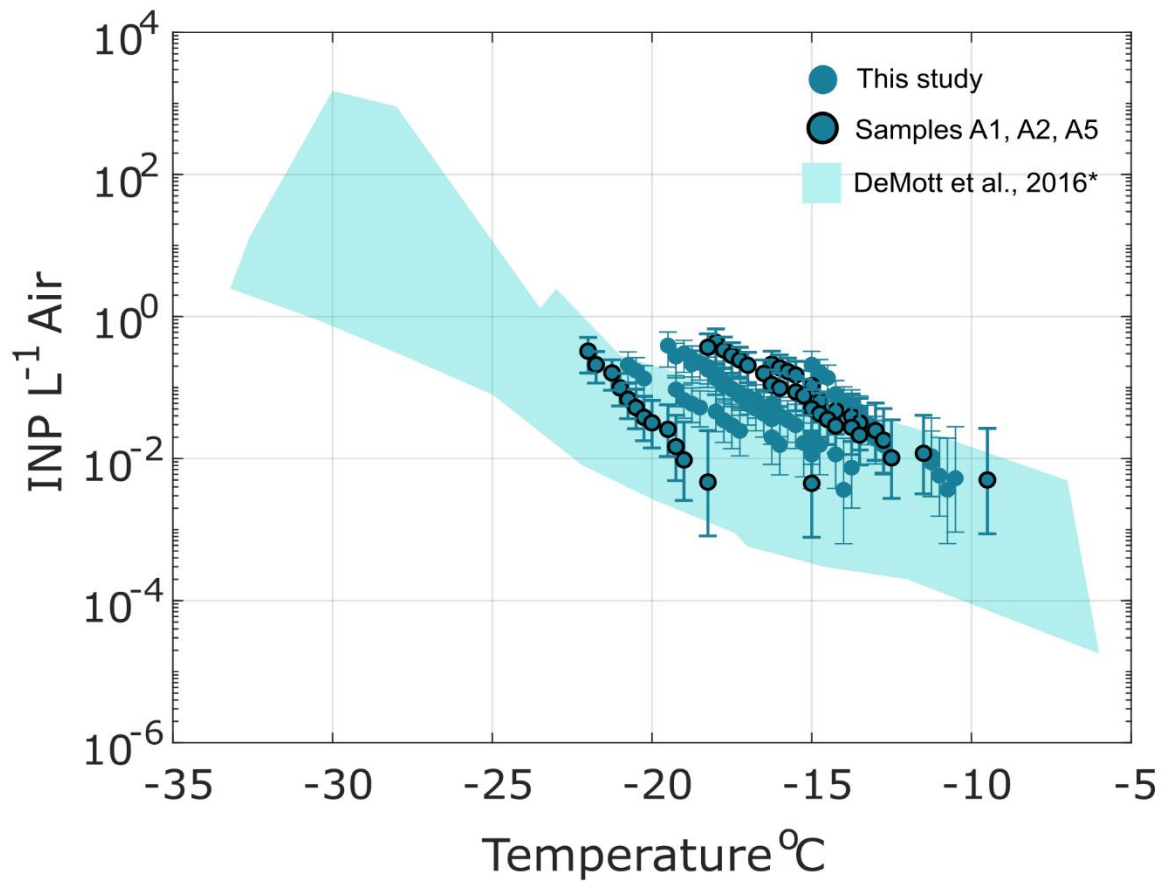

Figure S4

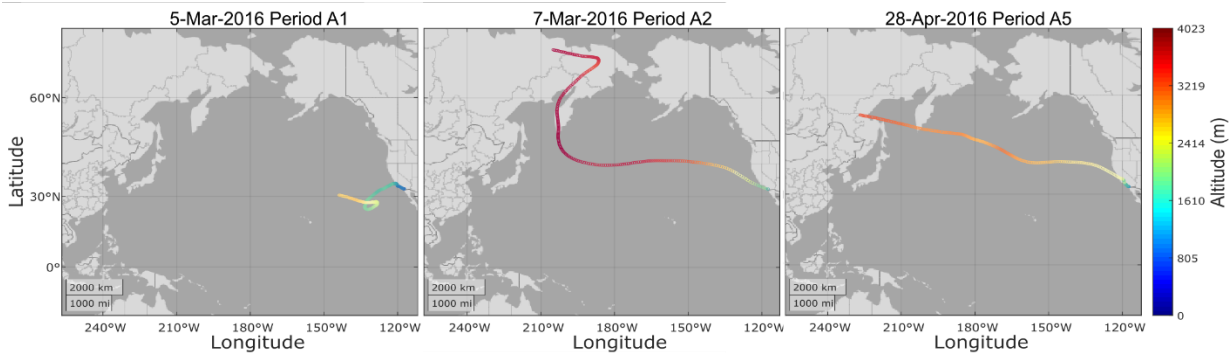

Figure S5

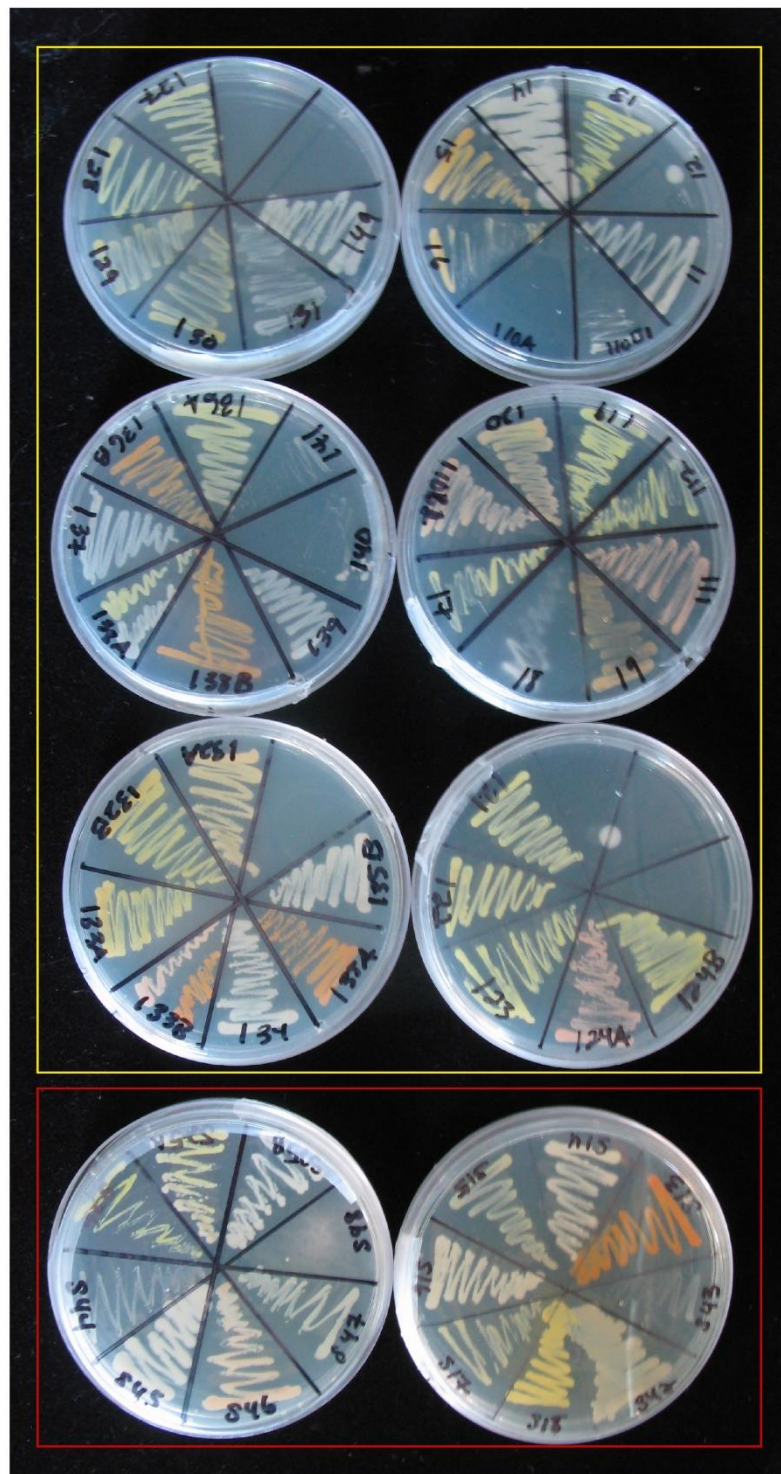

Figure S6

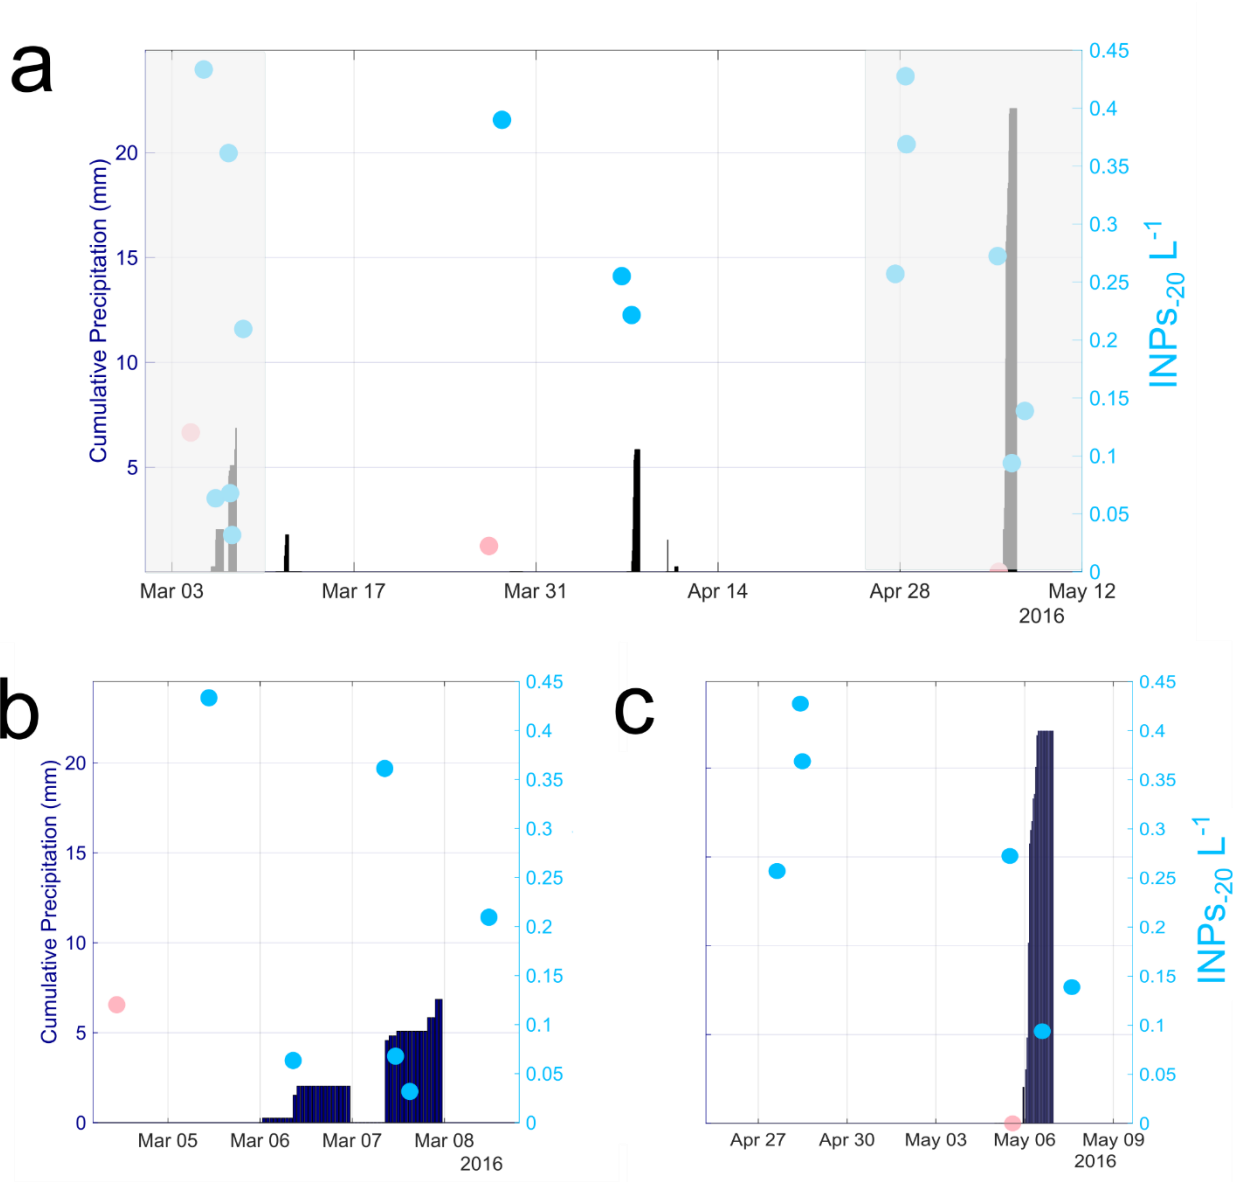

Figure S7

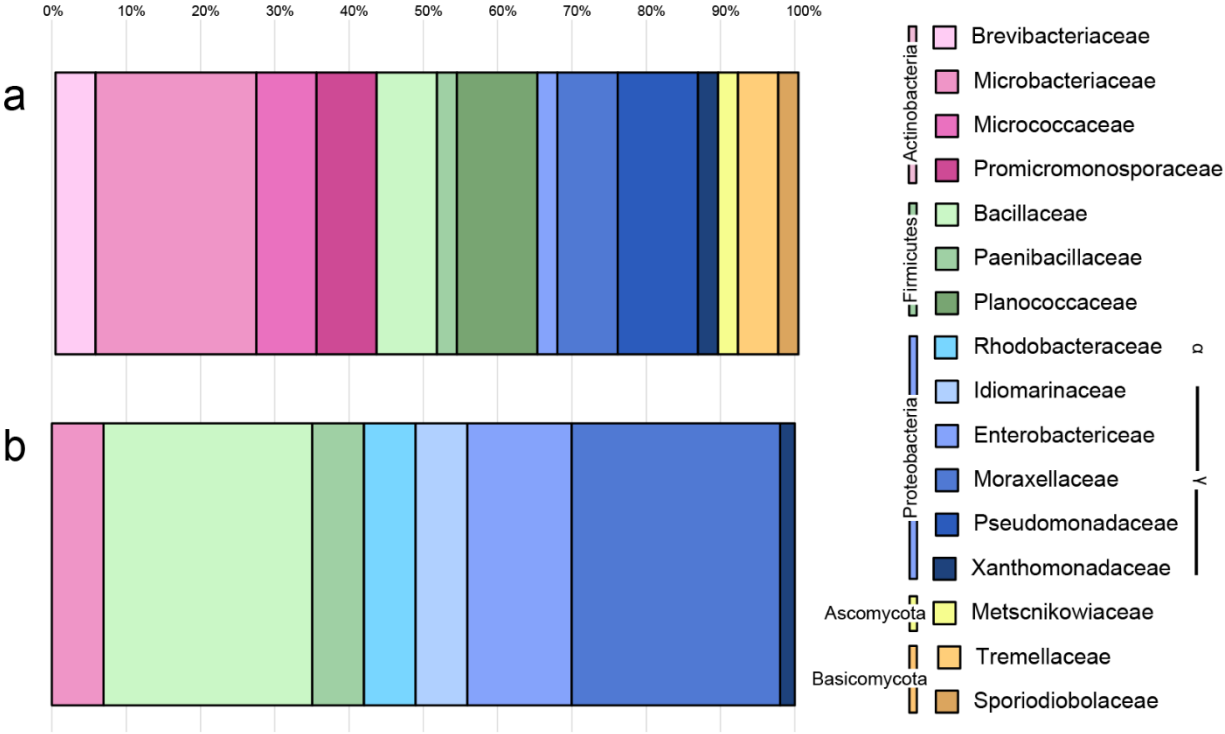

Figure S8

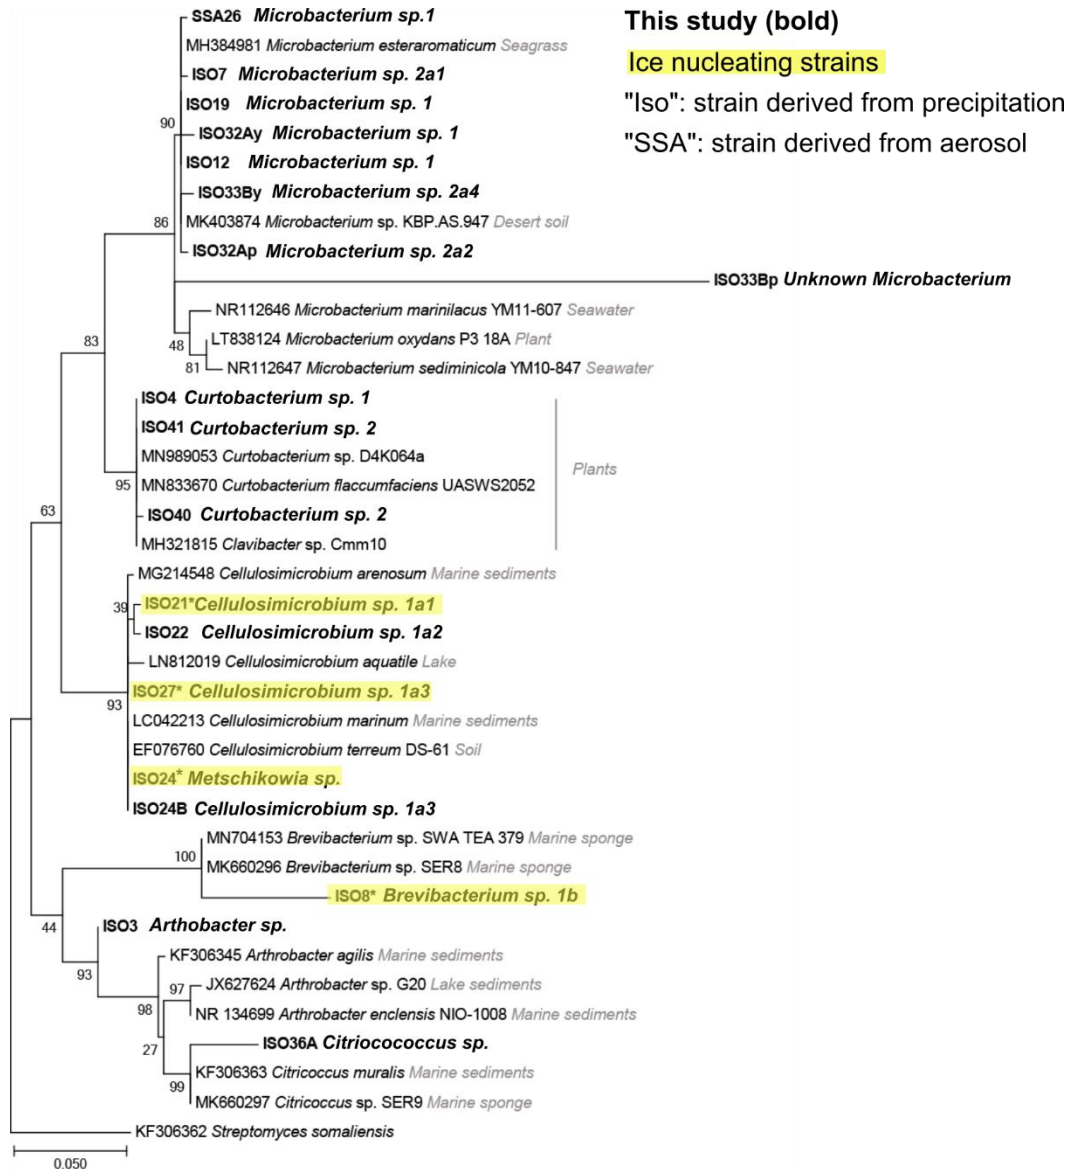

Figure S9

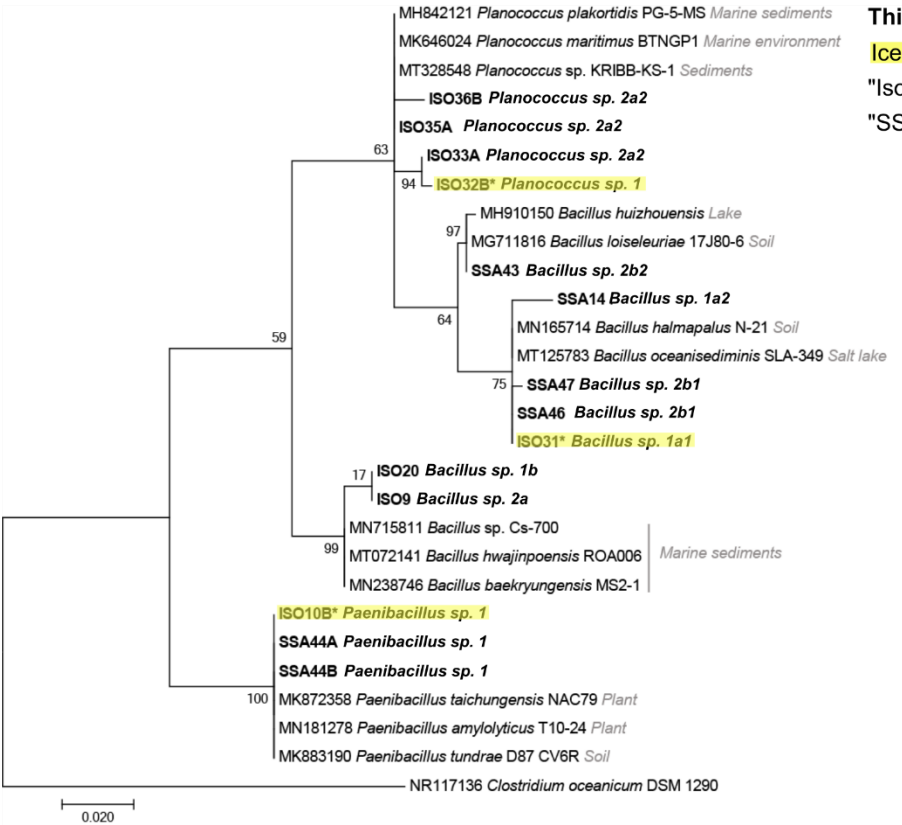

This study (bold)

Ice nucleating strains

"Iso": strain derived from precipitation

"SSA": strain derived from aerosol



Figure S10

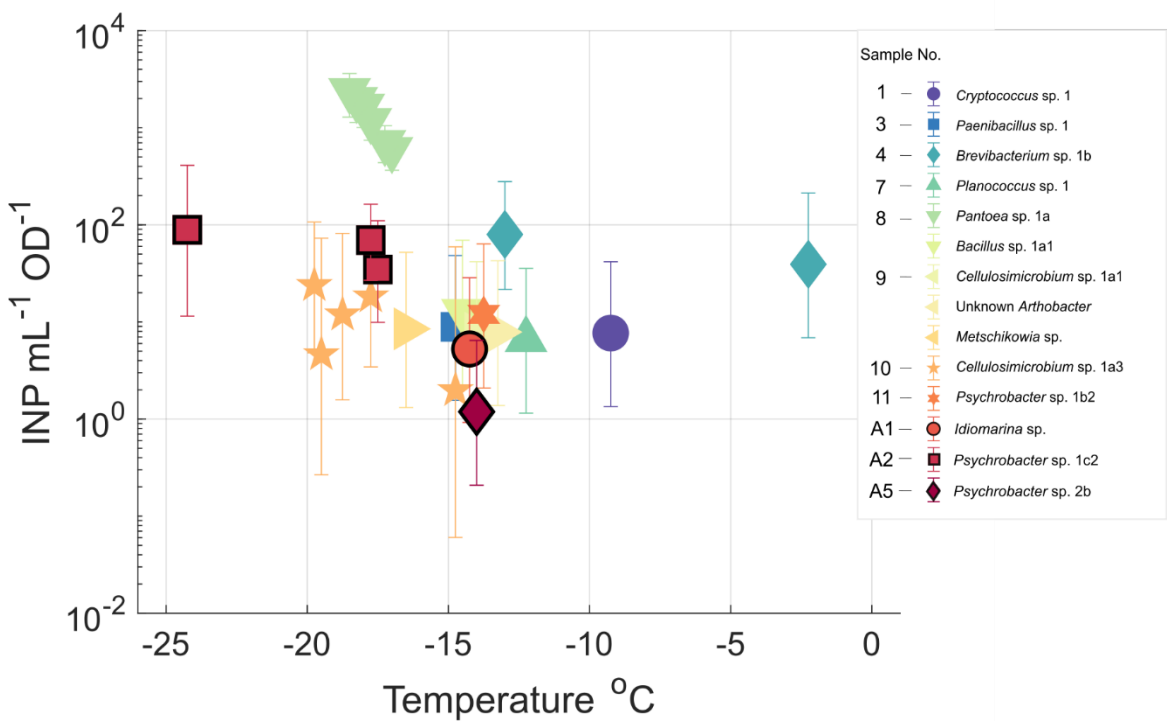

**Figure S11**

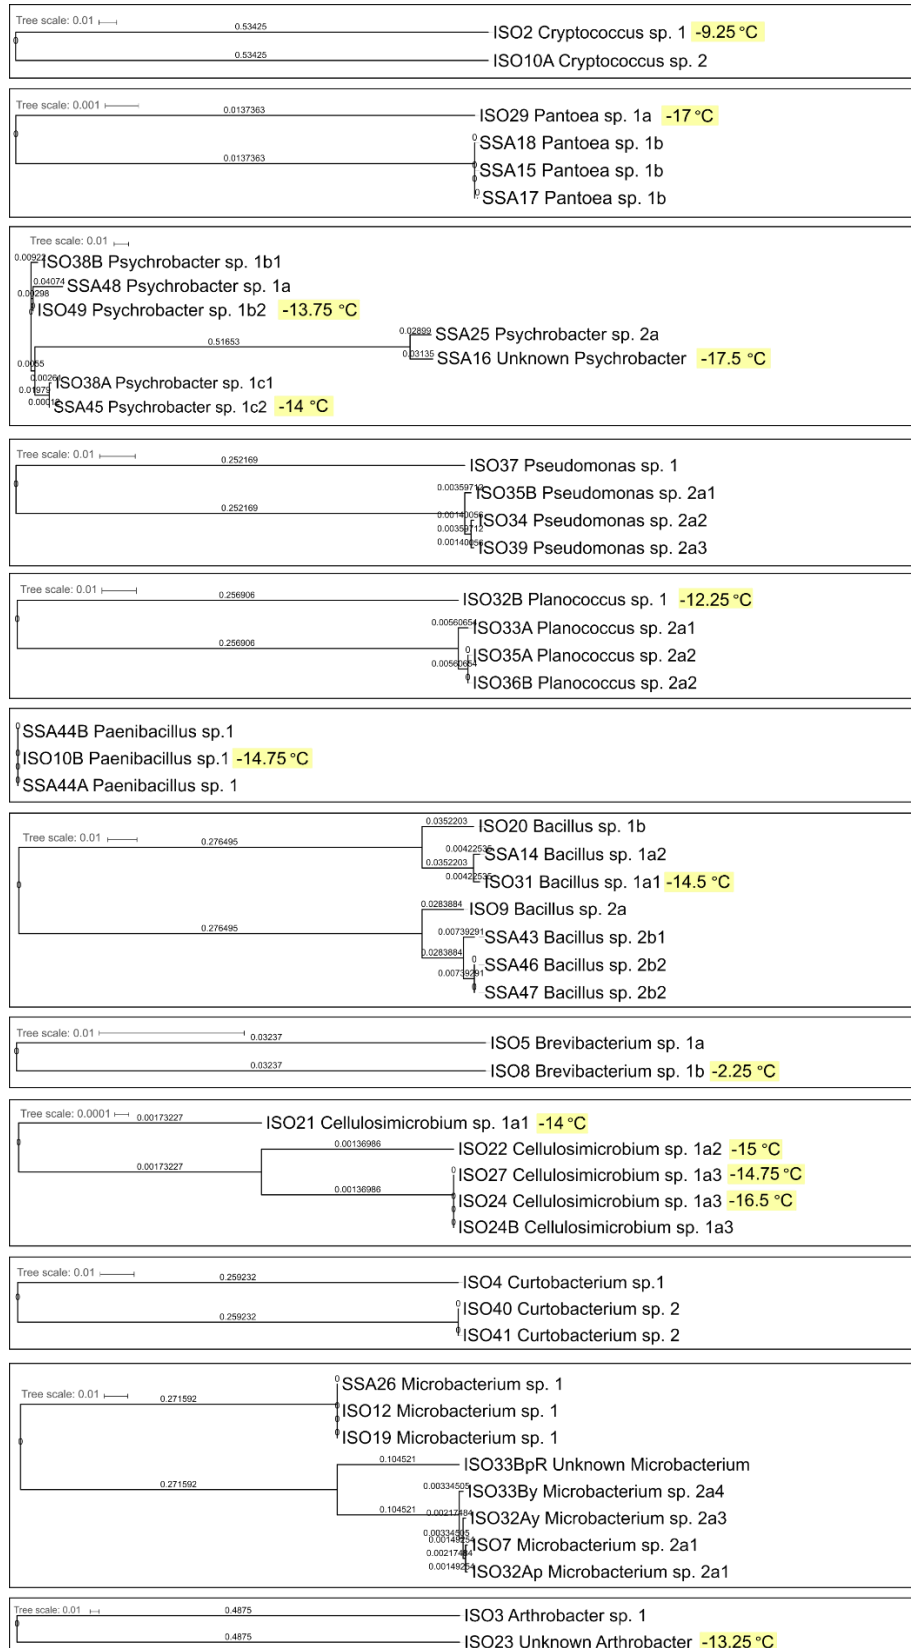

Supplement: Supplementary file 1 [file acp-2020-1229-supplement.pdf]
